# Supplementary material
Source: HighWire-hosted journal article supplement (http://thorax.bmjjournals.com/highwire/filestream/174124/field_highwire_adjunct_files/2/Sup_fig2.pdf)

Figure E2

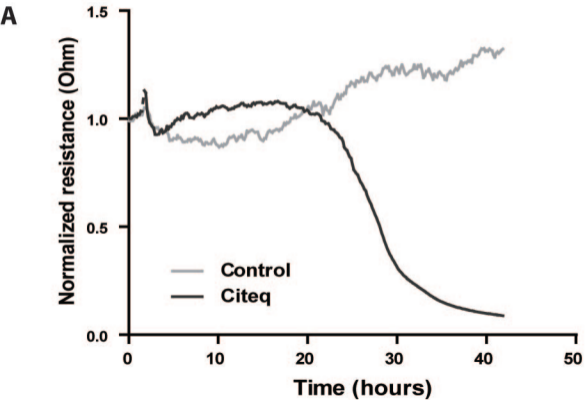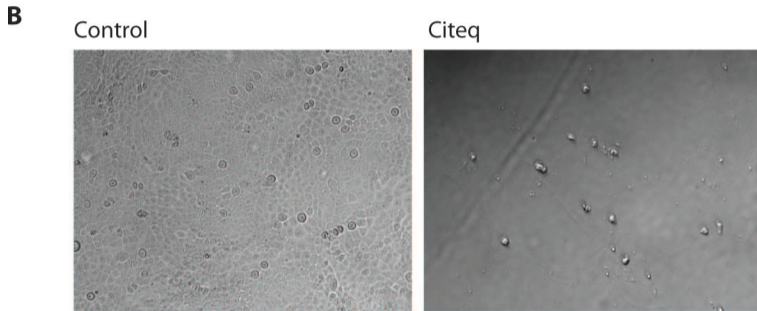

Supplement: Sup_fig2.pdf [file Sup_fig2.pdf]
